# Supplementary material for: A self-assembled peptide hydrogel for cytokine sequestration
Source: Royal Society of Chemistry journal article supplement (doi:10.1039/c9tb02250c), 2020-01-01
Supplement: c9tb02250c1.pdf [file c9tb02250c1.pdf]

## Electronic Supporting Information

### **A Self-assembled Peptide Hydrogel for Cytokine Sequestration**

Ka-Kyung Kim, Zain Siddiqui, Manali Patel, Biplab Sarkar,\* and Vivek A. Kumar\*

<sup>a</sup>Department of Biomedical Engineering, New Jersey Institute of Technology, NJ, USA, <sup>b</sup> Department of Chemical and Materials Engineering, New Jersey Institute of Technology, NJ, USA, <sup>c</sup> Department of Restorative Dentistry, Rutgers School of Dental Medicine, NJ, USA; Address for correspondence: KumarLab, 138 Warren St. Room 316, Newark, NJ, 07102, +1-678-613-1386; Address electronic correspondence to: either bsarkar@njit.edu or vak@njit.edu

---

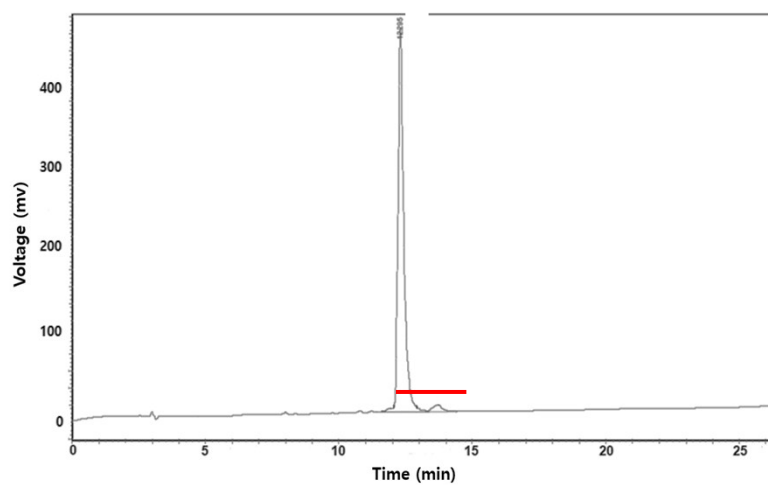

**Fig. S1.** HPLC trace of SLAM peptide shows a sharp peak and indicates >95% purity.

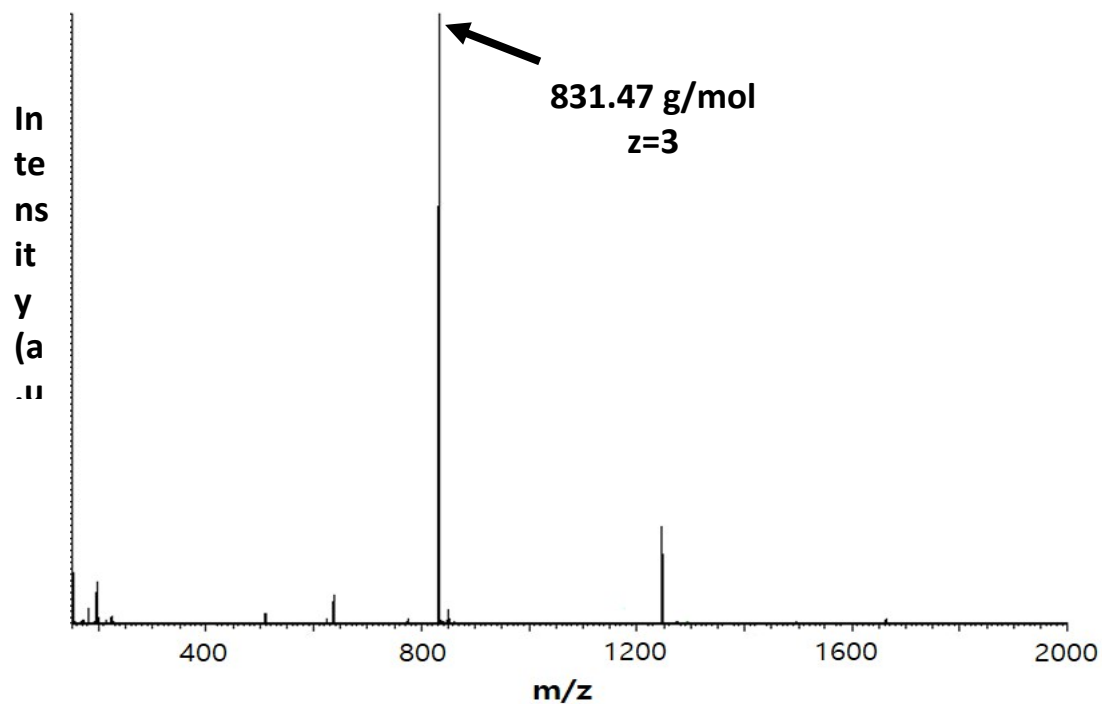

**Fig. S2.** Mass spectrum of the peptide SLAM. The expected average mass of the peptide is 2491.9 Da. The expected  $[M+3H]^{3+}$  peak is at 831.6 Da and the peak was observed at 831.47 Da.

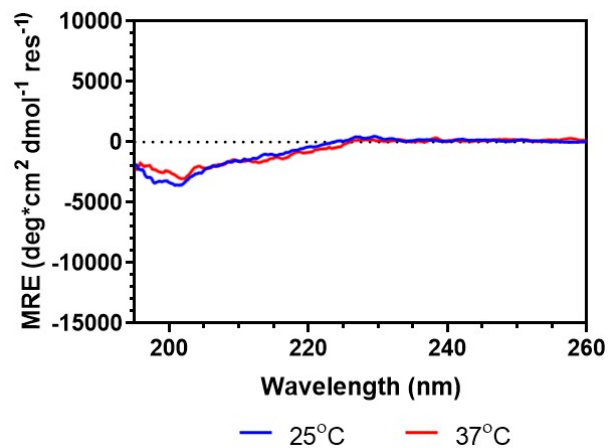

**Fig. S3.** Circular dichroism spectroscopy of peptide CCL2-binding mimic. Unlike SLaM, secondary structure of the mimic (peptide sequence: WKNFQTI) was confirmed to be random coil.

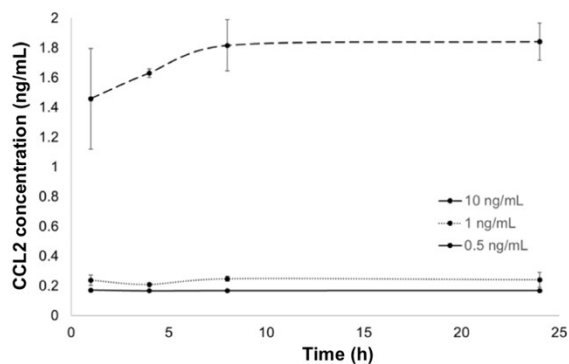

**Figure S4:** CCL2 sequestration of SLaM over 24 hours. CCL2 sequestration of SLaM over multiple time points (1, 4, 8 and 24 h) was observed with human MCP-1/CCL2 ELISA kit (Sigma-Aldrich). Initial CCL2 condition media displayed lower concentration in presence of SLaM over the 24 h period.

SLaM 7-Day:

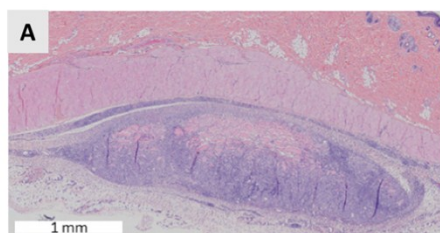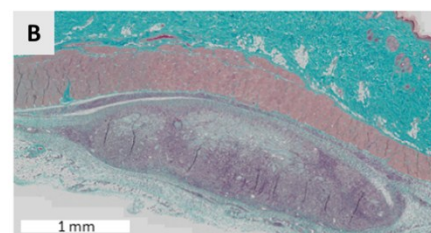

SLaM 14-Day:

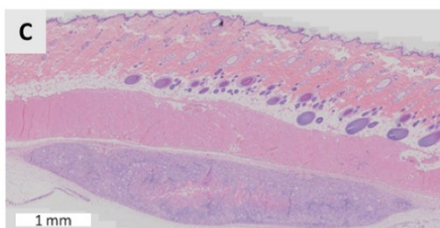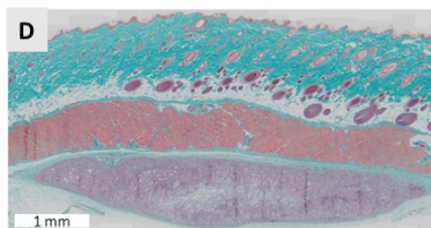

**Fig. S5.** Histology of SLaM implant in rat subcutaneous pocket. (A and C) Hematoxylin & eosin staining shows cellular infiltration within the implant with the bulk of the hydrogel bolus remaining undegraded over 2 weeks. (B and D). Masson's trichrome staining illustrates limited fibrous encapsulation around the hydrogel bolus.
